# Supplementary material for: Fe3O4quantum dot decorated MoS2nanosheet arrays on graphite paper as free-standing sodium-ion battery anodes
Source: Royal Society of Chemistry journal article supplement (doi:10.1039/c7ta01172e), 2017-01-01
Supplement: c7ta01172e1.pdf [file c7ta01172e1.pdf]

## Supporting Information

### **Fe<sub>3</sub>O<sub>4</sub> Quantum Dots Decorated MoS<sub>2</sub> Nanosheet Arrays on Graphite Paper as Free-Standing Sodium-Ion Batteries anode**

Dezhi Kong,<sup>a b</sup> Chuanwei Cheng,<sup>\* a</sup> Ye Wang,<sup>\*b</sup> Zhixiang Huang,<sup>b</sup> Bo Liu,<sup>b</sup> Yew Von Lim,<sup>b</sup> Qi Ge,<sup>b</sup> and Hui Ying Yang <sup>\* b</sup>

<sup>a</sup> Shanghai Key Laboratory of Special Artificial Microstructure Materials and Technology, School of Physics Science and Engineering, Tongji University, Shanghai 200092, P. R. China. E-mail: [cwcheng@tongji.edu.cn](mailto:cwcheng@tongji.edu.cn)

<sup>b</sup> Pillar of Engineering Product Development, Singapore University of Technology and Design, 8 Somapah Road, Singapore 487372, Singapore. E-mail: [yanghuiying@sutd.edu.sg](mailto:yanghuiying@sutd.edu.sg)

\* Corresponding authors: <sup>a</sup> [cwcheng@tongji.edu.cn](mailto:cwcheng@tongji.edu.cn); <sup>b</sup> [yewang@sutd.edu.sg](mailto:yewang@sutd.edu.sg) <sup>c</sup> [yanghuiying@sutd.edu.sg](mailto:yanghuiying@sutd.edu.sg)

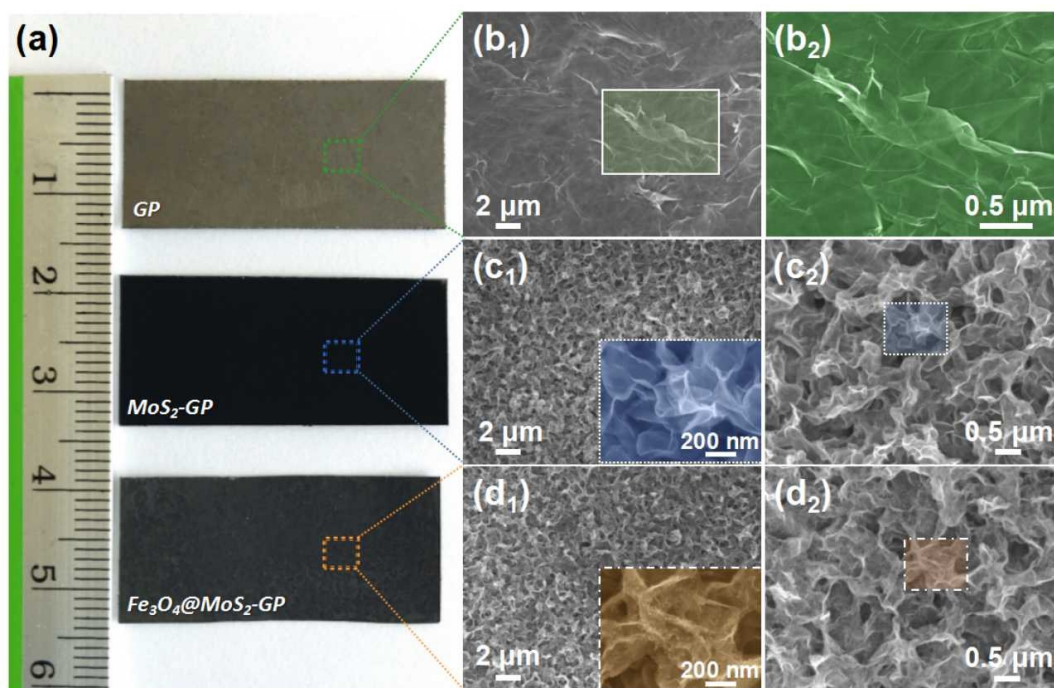

**Figure S1** (a) Photographs of graphite paper substrate, MoS<sub>2</sub> NSAs on graphite paper and Fe<sub>3</sub>O<sub>4</sub>@MoS<sub>2</sub> NSAs composite on graphite paper; (b<sub>1</sub>, b<sub>2</sub>) Low- and high-magnification SEM images of graphite paper substrate; (c<sub>1</sub>, c<sub>2</sub>) Low- and high-magnification SEM images of MoS<sub>2</sub> NSAs; (d<sub>1</sub>, d<sub>2</sub>) Low- and high-magnification SEM images of Fe<sub>3</sub>O<sub>4</sub>@MoS<sub>2</sub> NSAs composite.

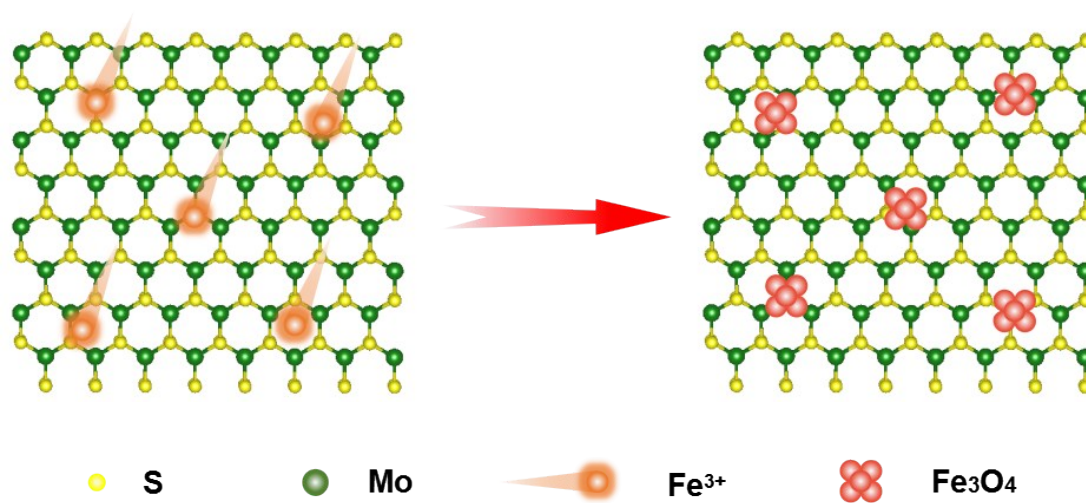

**Figure S2** Formation mechanism of Fe<sub>3</sub>O<sub>4</sub>@MoS<sub>2</sub> nanostructure.

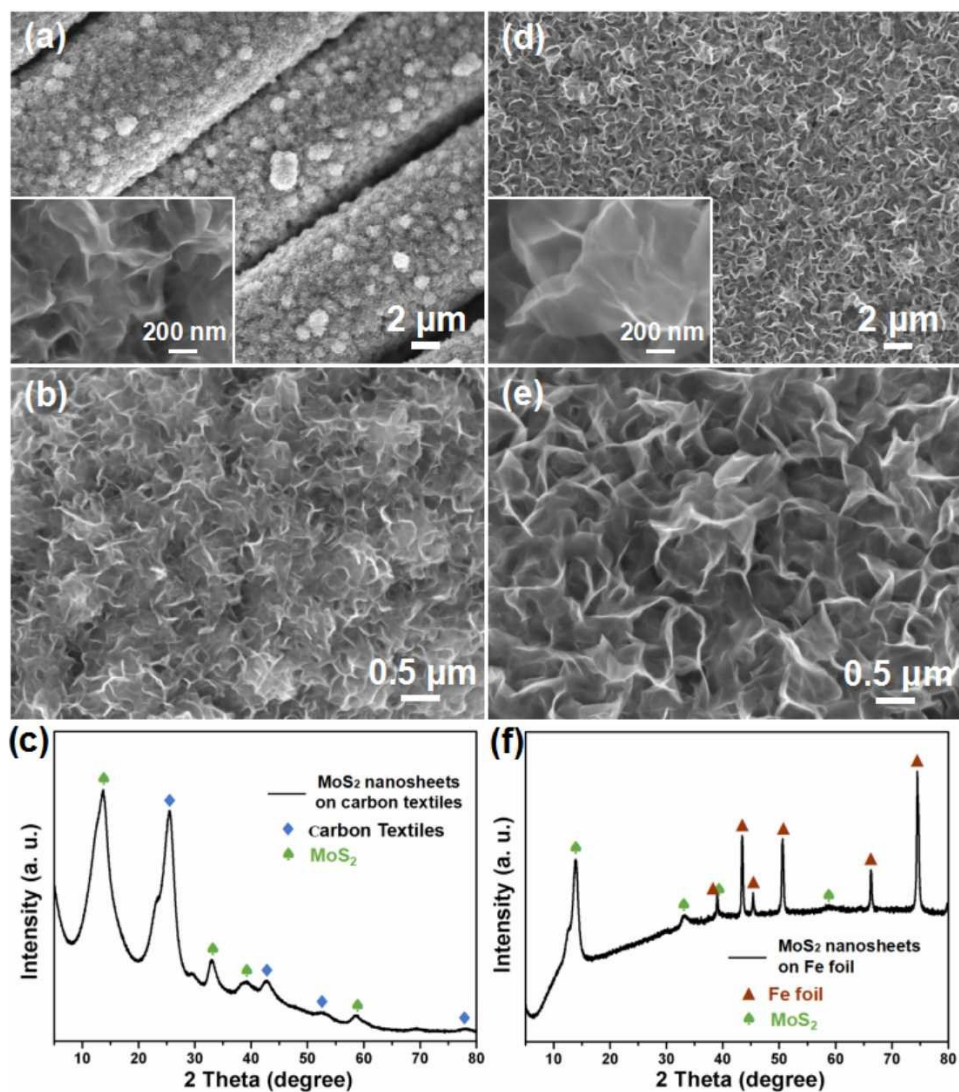

**Figure S3** (a, b) SEM images of the MoS<sub>2</sub> nanosheet arrays on carbon textiles substrate; (c) XRD pattern of the MoS<sub>2</sub> nanosheet arrays on carbon textiles substrate, confirming the composition; (d, e) SEM images of MoS<sub>2</sub> nanosheet arrays on Fe foil substrate; (f) XRD pattern of the MoS<sub>2</sub> nanosheet arrays on Fe foil substrate, confirming the composition. All these samples were fabricated based on the protocol proposed in Fig. 1, clearly demonstrating its generality.

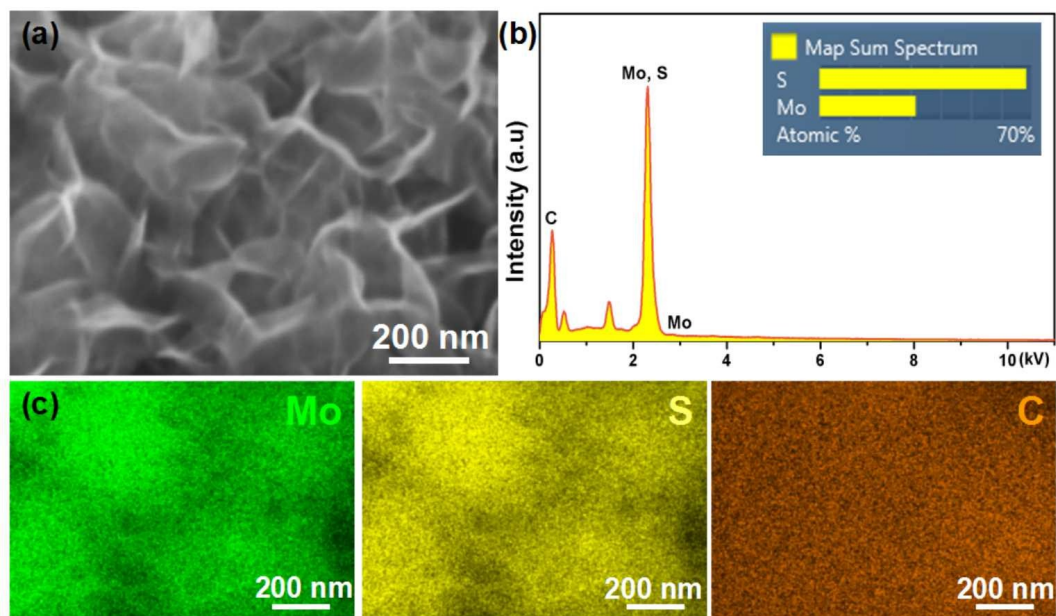

**Figure S4** (a) SEM images the MoS<sub>2</sub> nanosheets; (b) EDS microanalysis and the corresponding elemental contents on selected areas of the MoS<sub>2</sub> nanosheets; (c) EDS elemental mappings of Mo, S and C for the MoS<sub>2</sub> nanosheets with corresponding SEM image.

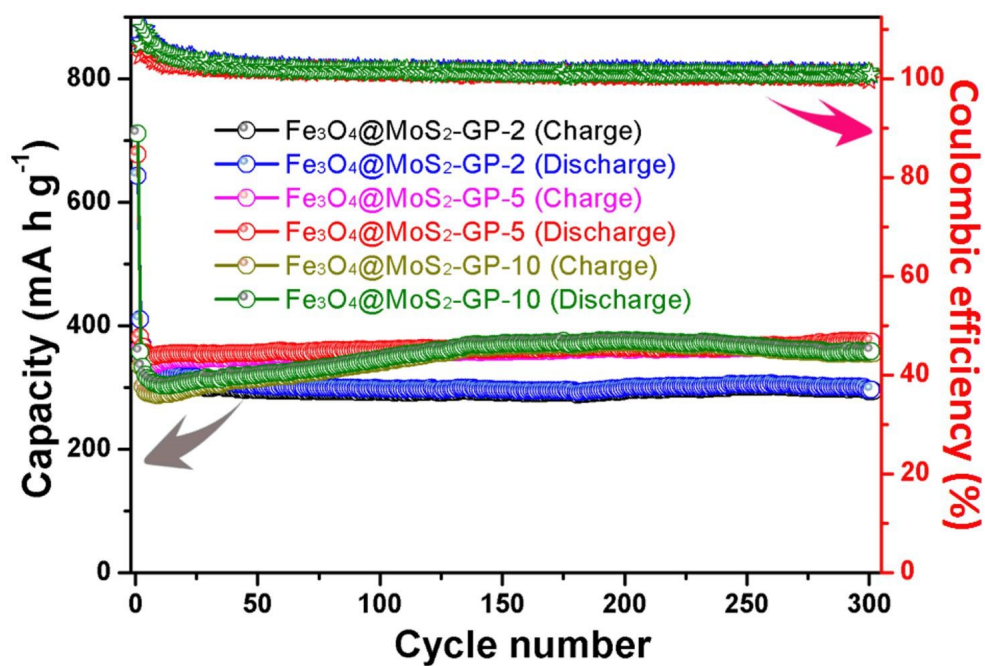

**Figure S5** Cycling performance of the  $\text{Fe}_3\text{O}_4@\text{MoS}_2\text{-GP}$  composites during the second hydrothermal process at various reaction stages by setting the reaction time to 2 h, 5 h, and 10 h (marked as  $\text{Fe}_3\text{O}_4@\text{MoS}_2\text{-GP-2}$ ,  $\text{Fe}_3\text{O}_4@\text{MoS}_2\text{-GP-5}$ , and  $\text{Fe}_3\text{O}_4@\text{MoS}_2\text{-GP-10}$ , respectively) at a constant current density of  $400 \text{ mA g}^{-1}$ .

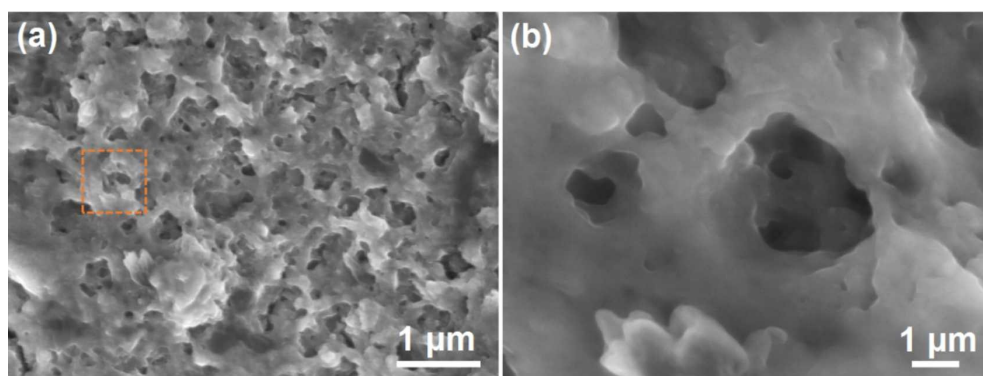

**Figure S6** SEM images of  $\text{Fe}_3\text{O}_4@\text{MoS}_2\text{-GP-10}$  anodes after 300 times cycling.

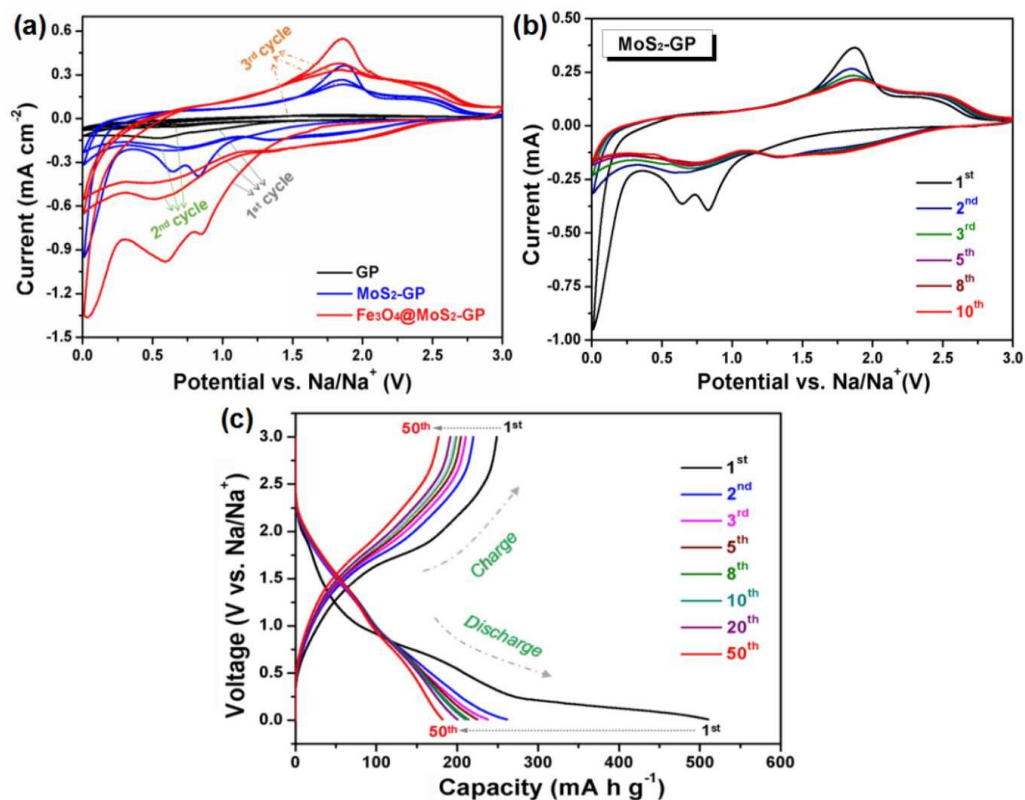

**Figure S7** (a) The initial three CV curves for GP, MoS<sub>2</sub>-GP, Fe<sub>3</sub>O<sub>4</sub>@MoS<sub>2</sub>-GP, recorded at a scan of 0.1 mV s<sup>-1</sup>; (e) Representative CV curves of an electrode based on the MoS<sub>2</sub>-GP obtained at a voltage range of 0 to 3.0 V (vs Na/Na<sup>+</sup>) and potential scan rate of 0.1 mV s<sup>-1</sup>; (b) Voltage profiles plotted for the first, second, third, 5<sup>th</sup>, 8<sup>th</sup>, 10<sup>th</sup>, 20<sup>th</sup> and 50<sup>th</sup> cycles of the MoS<sub>2</sub>-GP electrode at a current density of 100 mA g<sup>-1</sup>.

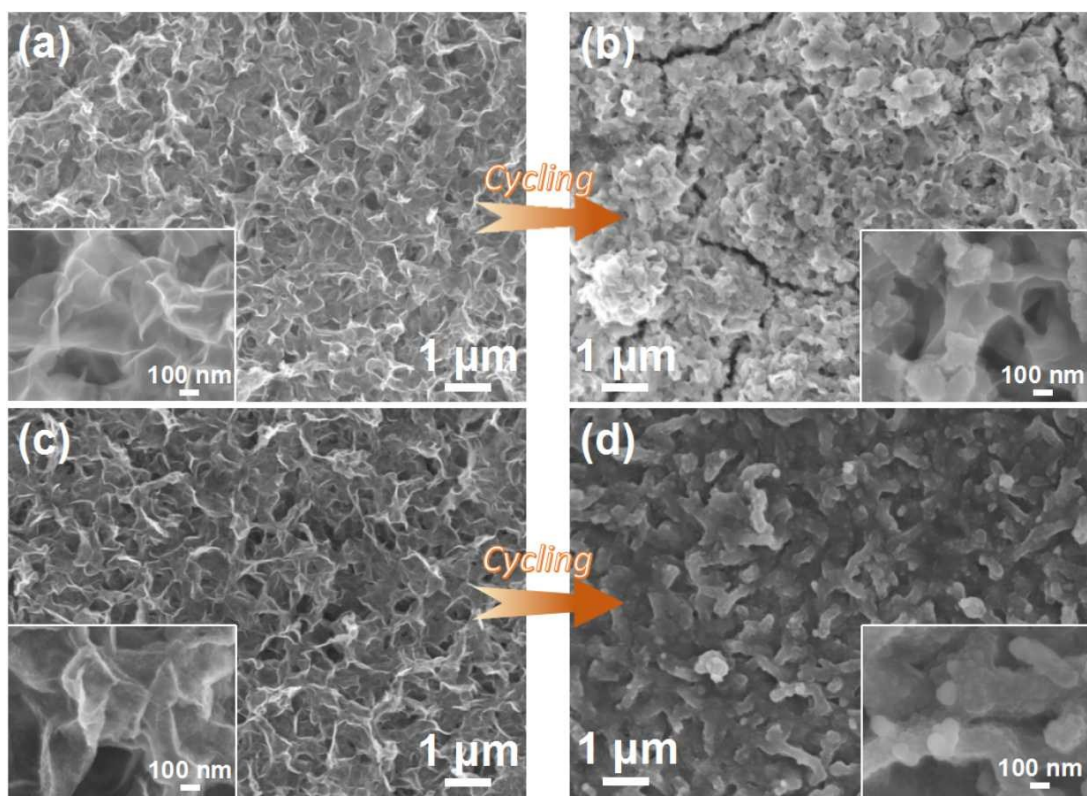

**Figure S8** SEM images of (a) MoS<sub>2</sub>, (c) Fe<sub>3</sub>O<sub>4</sub>@MoS<sub>2</sub> anodes before cycling, and (b) MoS<sub>2</sub>, (d) Fe<sub>3</sub>O<sub>4</sub>@MoS<sub>2</sub> anodes after 300 times cycling.

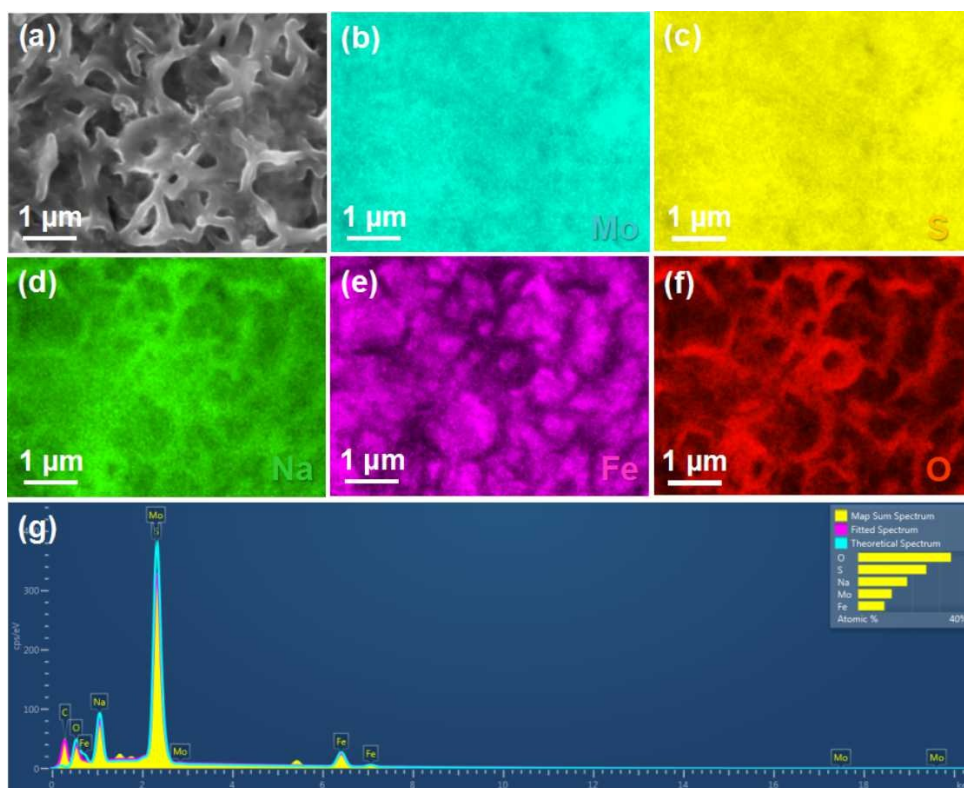

**Figure S9** (a) SEM image of a cracked Fe<sub>3</sub>O<sub>4</sub>@MoS<sub>2</sub> anodes after 300 times cycling; The corresponding EDS elemental dot-mapping images of (b) Mo, (c) S, (d) Na, (e) Fe and (f) O elements; (g) EDS microanalysis and the corresponding elemental contents on selected areas of the Fe<sub>3</sub>O<sub>4</sub>@MoS<sub>2</sub> anodes after 300 cycles.

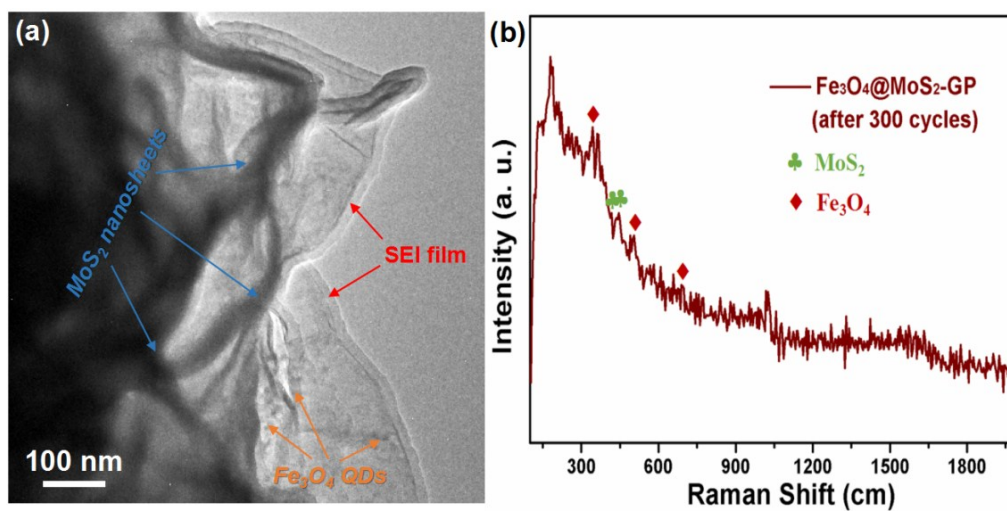

**Figure S10** TEM image (a) and Raman spectra (b) of  $\text{Fe}_3\text{O}_4@\text{MoS}_2$  composite after 300 times cycling.

**Table S1** The comparison of electrochemical performance for MoS<sub>2</sub> nanostructures and MoS<sub>2</sub>-based composite nanomaterials prepared by different methods.

| Electrode description                                          | Specific capacity (vs. Na/Na <sup>+</sup> )          | High rate capability (vs. Na/Na <sup>+</sup> )        | Cycling stability (%)                             | Ref.      |
|----------------------------------------------------------------|------------------------------------------------------|-------------------------------------------------------|---------------------------------------------------|-----------|
| Fe <sub>3</sub> O <sub>4</sub> @MoS <sub>2</sub> -GP composite | 468 mAh g <sup>-1</sup> at 100 mA g <sup>-1</sup>    | 231 mA h g <sup>-1</sup> at 3200 mA g <sup>-1</sup>   | ~72.5% after 300 cycles at 100 mA g <sup>-1</sup> | This work |
| MoS <sub>2</sub> @C-CMC                                        | 446 mAh g <sup>-1</sup> at 20 mA g <sup>-1</sup>     | 205 mAh g <sup>-1</sup> at 1000 mA g <sup>-1</sup>    | ~79.4% after 100 cycles at 80 mA g <sup>-1</sup>  | [1]       |
| Asprepared MoS <sub>2</sub> nanosheet arrays                   | 530 mAh g <sup>-1</sup> at 40 mA g <sup>-1</sup>     | 251 mAh g <sup>-1</sup> at 320 mA g <sup>-1</sup>     | ~72.8% after 100 cycles at 40 mA g <sup>-1</sup>  | [2]       |
| MoS <sub>2</sub> /Graphene composite                           | ~550 mAh g <sup>-1</sup> at 20 mA g <sup>-1</sup>    | 352 mAh g <sup>-1</sup> at 640 mA g <sup>-1</sup>     | ~50.8% after 100 cycles at 67 mA g <sup>-1</sup>  | [3]       |
| MoS <sub>2</sub> microflowers                                  | 595 mAh g <sup>-1</sup> at 67 mA g <sup>-1</sup>     | 240 mAh g <sup>-1</sup> at 6700 mA g <sup>-1</sup>    | ~50.8% after 50 cycles at 80 mA g <sup>-1</sup>   | [4]       |
| MoS <sub>2</sub> /Graphene composite paper                     | 240 mAh g <sup>-1</sup> at 25 mA g <sup>-1</sup>     | 173 mAh g <sup>-1</sup> at 200 mA g <sup>-1</sup>     | ~83% after 20 cycles at 25 mA g <sup>-1</sup>     | [5]       |
| MoS <sub>2</sub> -PEO <sub>21</sub> nanocomposite              | 185 mAh g <sup>-1</sup> at 50 mA g <sup>-1</sup>     | 112 mA h g <sup>-1</sup> at 1000 mA g <sup>-1</sup>   | ~65.8% after 70 cycles at 50 mA g <sup>-1</sup>   | [6]       |
| Yolk-shell SnS-MoS <sub>2</sub> composite microspheres         | 453 mAh g <sup>-1</sup> at 200 mA g <sup>-1</sup>    | 238 mA h g <sup>-1</sup> at 7000 mA g <sup>-1</sup>   | 89% after 100 cycles at 500 mA g <sup>-1</sup>    | [7]       |
| MoS <sub>2</sub> /SWNT composite                               | 437 mAh g <sup>-1</sup> at 50 mA g <sup>-1</sup>     | 192 mA h g <sup>-1</sup> at 20000 mA g <sup>-1</sup>  | ~95% after 100 cycles at 200 mA g <sup>-1</sup>   | [8]       |
| HfO <sub>2</sub> -coated MoS <sub>2</sub> nanosheet            | 613 mA h g <sup>-1</sup> at 100 mA g <sup>-1</sup>   | 347 mA h g <sup>-1</sup> at 1000 mA g <sup>-1</sup>   | 91% after 50 cycles at 100 mA g <sup>-1</sup>     | [9]       |
| TiO <sub>2</sub> -coated MoS <sub>2</sub> nanofiber            | ~740 mA h g <sup>-1</sup> at 100 mA g <sup>-1</sup>  | 510 mA h g <sup>-1</sup> at 2500 mA g <sup>-1</sup>   | 64% after 30 cycles at 100 mA g <sup>-1</sup>     | [10]      |
| TiO <sub>2</sub> -B/MoS <sub>2</sub> nanowire array            | 214 mA h g <sup>-1</sup> at 20 mA g <sup>-1</sup>    | 48 mA h g <sup>-1</sup> at 4000 mA g <sup>-1</sup>    | ~89.2% after 100 cycles at 20 mA g <sup>-1</sup>  | [11]      |
| MoS <sub>2</sub> /C nanospheres                                | 520 mA h g <sup>-1</sup> at 67 mA g <sup>-1</sup>    | 390 mA h g <sup>-1</sup> at 1340 mA g <sup>-1</sup>   | ~77.5% after 50 cycles at 67 mA g <sup>-1</sup>   | [12]      |
| Mesoporous MoS <sub>2</sub> /C-31 microspheres                 | 481 mA h g <sup>-1</sup> at 100 mA g <sup>-1</sup>   | 244 mA h g <sup>-1</sup> at 20000 mA g <sup>-1</sup>  | ~94% after 100 cycles at 100 mA g <sup>-1</sup>   | [13]      |
| MoS <sub>2</sub> -CNFs film                                    | 381.7 mA h g <sup>-1</sup> at 100 mA g <sup>-1</sup> | 186.3 mA h g <sup>-1</sup> at 2000 mA g <sup>-1</sup> | 74.8% after 600 cycles at 100 mA g <sup>-1</sup>  | [14]      |
| MoS <sub>2</sub> /rGO composite                                | 575 mA h g <sup>-1</sup> at 100 mA g <sup>-1</sup>   | 406 mA h g <sup>-1</sup> at 1000 mA g <sup>-1</sup>   | 94% after 50 cycles at 100 mA g <sup>-1</sup>     | [15]      |
| MoS <sub>2</sub> /Graphene Composites                          | 491.7 mA h g <sup>-1</sup> at 50 mA g <sup>-1</sup>  | 247.2 mA h g <sup>-1</sup> at 2000 mA g <sup>-1</sup> | 81% after 200 cycles at 100 mA g <sup>-1</sup>    | [16]      |
| Multiwalled carbon@MoS <sub>2</sub> @carbon nanocables         | ~968 mA h g <sup>-1</sup> at 70 mA g <sup>-1</sup>   | 817 mA h g <sup>-1</sup> at 7000 mA g <sup>-1</sup>   | 77% after 200 cycles at 700 mA g <sup>-1</sup>    | [17]      |
| MoS <sub>2</sub> @C nanotubes                                  | 610 mA h g <sup>-1</sup> at 50 mA g <sup>-1</sup>    | 370 mA h g <sup>-1</sup> at 2500 mA g <sup>-1</sup>   | 80% after 200 cycles at 500 mA g <sup>-1</sup>    | [18]      |
| MoS <sub>2</sub> @ACNTs                                        | 572 mA h g <sup>-1</sup> at 100 mA g <sup>-1</sup>   | 396 mA h g <sup>-1</sup> at 1600 mA g <sup>-1</sup>   | ~72% after 150 cycles at 500 mA g <sup>-1</sup>   | [19]      |
| 3D MoS <sub>2</sub> nanosheet/CNTs composite                   | 540 mA h g <sup>-1</sup> at 50 mA g <sup>-1</sup>    | 328.4 mA h g <sup>-1</sup> at 500 mA g <sup>-1</sup>  | 89.3% after 100 cycles at 50 mA g <sup>-1</sup>   | [20]      |

## References

- [1] X. Q. Xie, T. Makaryan, M. Q. Zhao, K. L. V. Aken, Y. Gogotsi and G. X. Wang, *Adv. Energy Mater.*, 2016, 6, 1502161.
- [2] D. W. Su, S. X. Dou and G. X. Wang, *Adv. Energy Mater.*, 2015, 5, 1401205.
- [3] P. R. Kumar, Y. H. Jung and D. K. Kim, *RSC Adv.*, 2015, 5, 79845-79851.

- [4] X. Q. Xie, Z. M. Ao, D. W. Su, J. Q. Zhang and G. X. Wang, *Adv. Funct. Mater.*, 2015, 25, 1393-1403.
- [5] L. David, R. Bhandavat and G. Singh, *ACS Nano*, 2014, 8, 1759-1770.
- [6] Y. F. Li, Y. L. Liang, F. C. R. Hernandez, H. D. Yoo, Q. Y. An and Y. Yao, *Nano Energy*, 2015, 15, 453-461.
- [7] S. H. Choi and Y. C. Kang, *ACS Appl. Mater. Interfaces*, 2015, 7, 24694-24702
- [8] Y. P. Liu, X. Y. He, D. Hanlon, A. Harvey, J. N. Coleman and Y. G. Li, *ACS Nano*, 2016, 10, 8821-8828.
- [9] B. Ahmed, D. H. Anjum, M. N. Hedhili and H. N. Alshareef, *Small*, 2015, 11, 4341-4350.
- [10] W. H. Ryu, J. W. Jung, K. Park, S. J. Kim and I. D. Kim, *Nanoscale*, 2014, 6, 10975-10981.
- [11] J. Y. Liao, B. D. Luna and A. Manthiram, *J. Mater. Chem. A*, 2016, 4, 801-806.
- [12] J. J. Wang, C. Luo, T. Gao, A. Langrock, A. C. Mignerey and C. S. Wang, *Small*, 2015, 11, 473-481.
- [13] Y. Y. Lu, Q. Zhao, N. Zhang, K. X. Lei, F. J. Li and J. Chen, *Adv. Funct. Mater.*, 2016, 26, 911-918.
- [14] X. Q. Xiong, W. Luo, X. L. Hu, C. J. Chen, L. Qie, D. F. Hou and Y. H. Huang, *Sci. Rep.*, 2015, 5, 09254.
- [15] T. S. Sahu and S. Mitra, *Sci. Rep.*, 2015, 5, 12571.
- [16] Y. X. Wang, S. L. Chou, D. Wexler, H. K. Liu and S. X. Dou, *Chem. Eur. J.*, 2014, 20, 9607-9612.
- [17] Y. Wang, Q. T. Qu, G. C. Li, T. Gao, F. Qian, J. Shao, W. J. Liu, Q. Shi and H. H. Zheng, *Small*, 2016, 12, 6033-6041.
- [18] X. Q. Zhang, X. N. Li, J. W. Liang, Y. C. Zhu and Y. T. Qian, *Small*, 2016, 12, 2484-2491.
- [19] X. Xu, D. M. Yu, H. Zhou, L. S. Zhang, C. H. Xiao, C. W. Guo, S. W. Guo and S. J. Ding, *J. Mater. Chem. A*, 2016, 4, 4375-4379.
- [20] S. Zhang, X. B. Yu, H. L. Yu, Y. J. Chen, P. Gao, C. Y. Li and C. L. Zhu, *ACS Appl. Mater. Interfaces*, 2014, 6, 21880-21885.
